# Supplementary material for: Single step hydrothermal approach for devising hierarchical Ag–ZnO heterostructures with significant enhancement in field emission performance
Source: Royal Society of Chemistry journal article supplement (doi:10.1039/c3ce40792f), 2013-01-01
Supplement: c3ce40792f.pdf [file c3ce40792f.pdf]

**Fig. S-1**



**Fig. S-1** EDS spectrum with elemental analysis of Ag-ZnO heterostructures (Sample I).

**Fig. S-2**



**Fig. S-2** TG analysis of Ag-ZnO heterostructures (Sample I).

**Fig. S-3**



**Fig. S-3** XPS spectra from ZnO nanorods (Sample II) (a) Survey scan, (b) Zn 2p and (c) O 1s component.

**Fig. S-4** Two movies recorded of the field emission image.
